# Supplementary material for: Synthesis and dehydrocoupling reactivity of iron and ruthenium phosphine–borane complexes
Source: Royal Society of Chemistry journal article supplement (doi:10.1039/b718918d), 2008-01-01
Supplement: b718918d.pdf [file b718918d.pdf]

**Supporting Information:**

$^1\text{H}$ ,  $^{13}\text{C}\{^1\text{H}\}$  and proton-coupled  $^{11}\text{B}$  NMR spectra of compound **5** in  $\text{CDCl}_3$ .

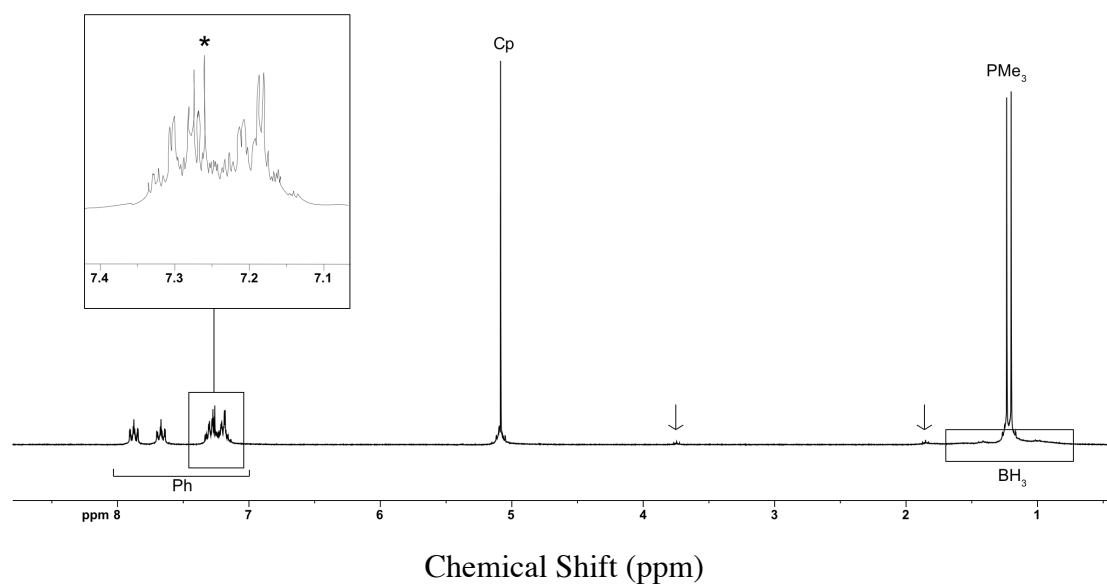

**Figure 1:** The  $^1\text{H}$  NMR spectrum of **5** recorded in  $\text{CDCl}_3$  (\* indicates solvent peaks and the arrows indicate the impurity).

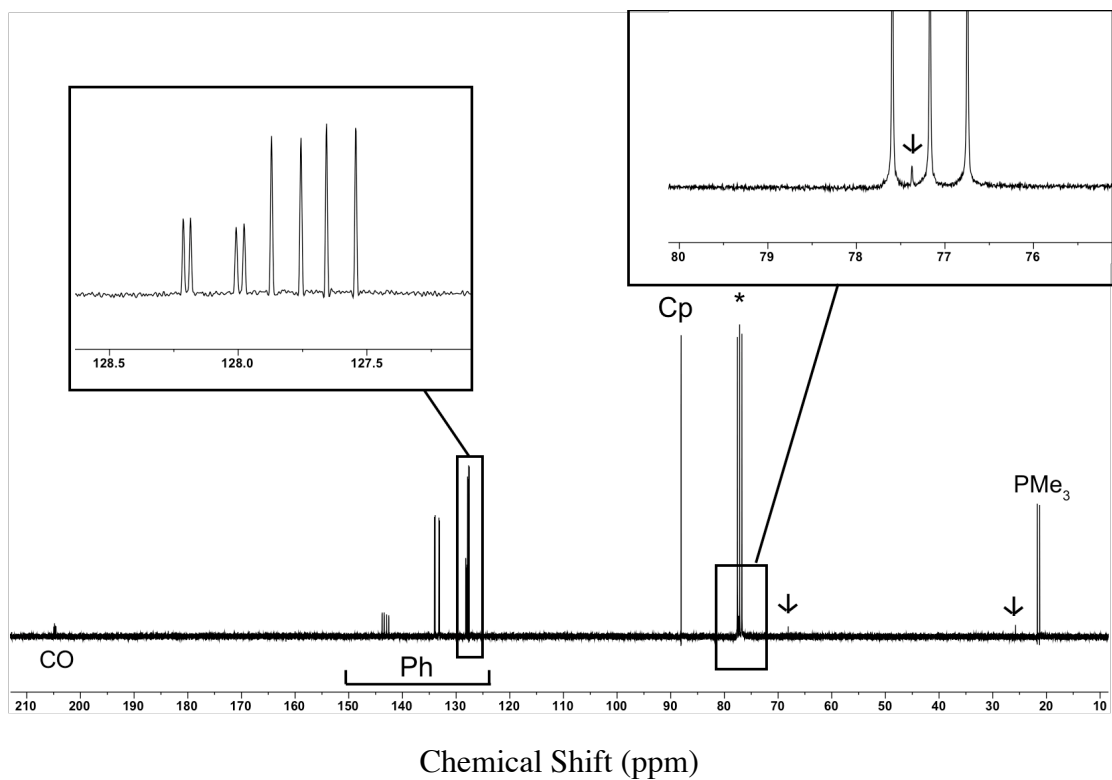

**Figure 2:** The  $^{13}\text{C}\{^1\text{H}\}$ -NMR spectrum of **5** recorded in  $\text{CDCl}_3$  (\* indicates solvent peaks and the arrows indicate the impurity).

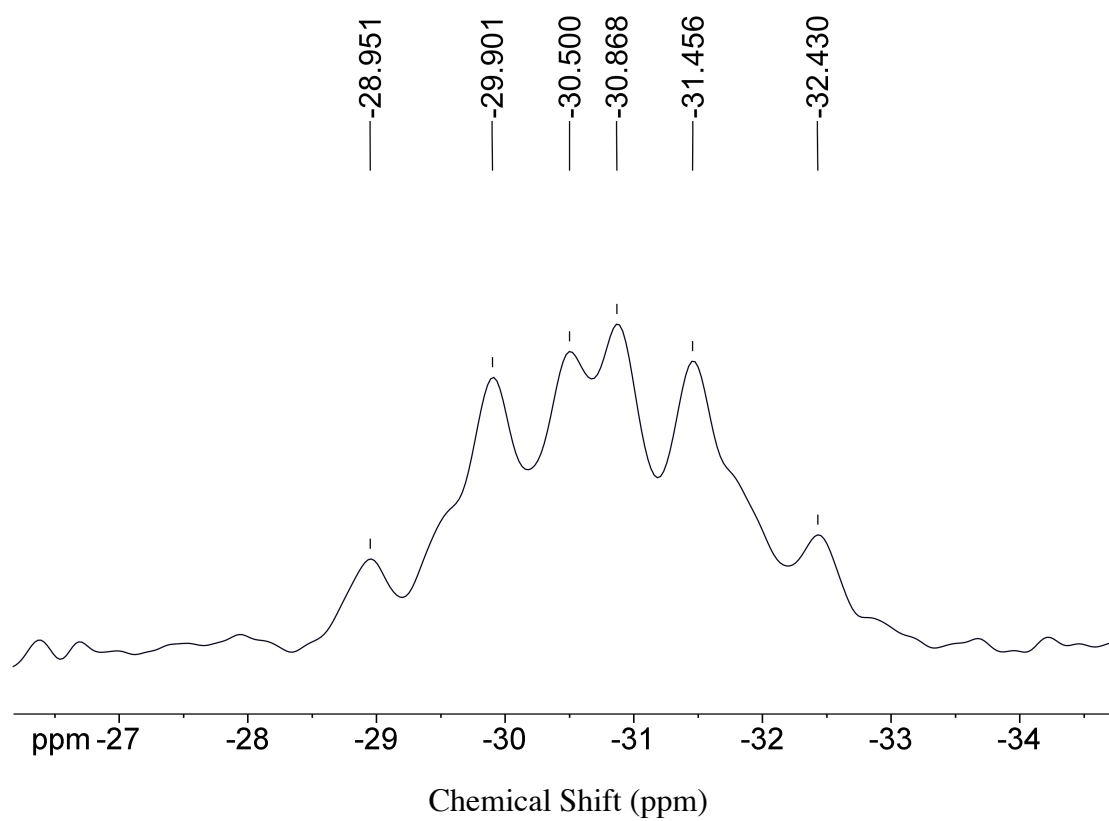

**Figure 3:** The proton-coupled  $^{11}\text{B}$ -NMR spectrum of **5** recorded in  $\text{CDCl}_3$  at  $60\text{ }^\circ\text{C}$ .
